# Supplementary material
Source: publisher figshare collection journal article supplement (https://acs.figshare.com/ndownloader/files/5154637)
Supplement: Supplementary file 1 [file 5154637]

## **Supporting Information**

**Supplementary Figure Captions:**

**Figure S1:**  $^1\text{H}$  NMR of  $\text{Mo}[\text{L}^{\text{a}}]_2$  in  $\text{CDCl}_3$ .

**Figure S2:**  $^{13}\text{C}$  NMR of  $\text{Mo}[\text{L}^{\text{a}}]_2$  in  $\text{CDCl}_3$ .

**Figure S3:** Molecular orbital diagrams of  $\text{Mo}[\text{L}^{\text{a}}]_2$  : (i) HOMO-1, (ii) HOMO, (iii) LUMO, (iv) LUMO+1 , and (v) LUMO+2.

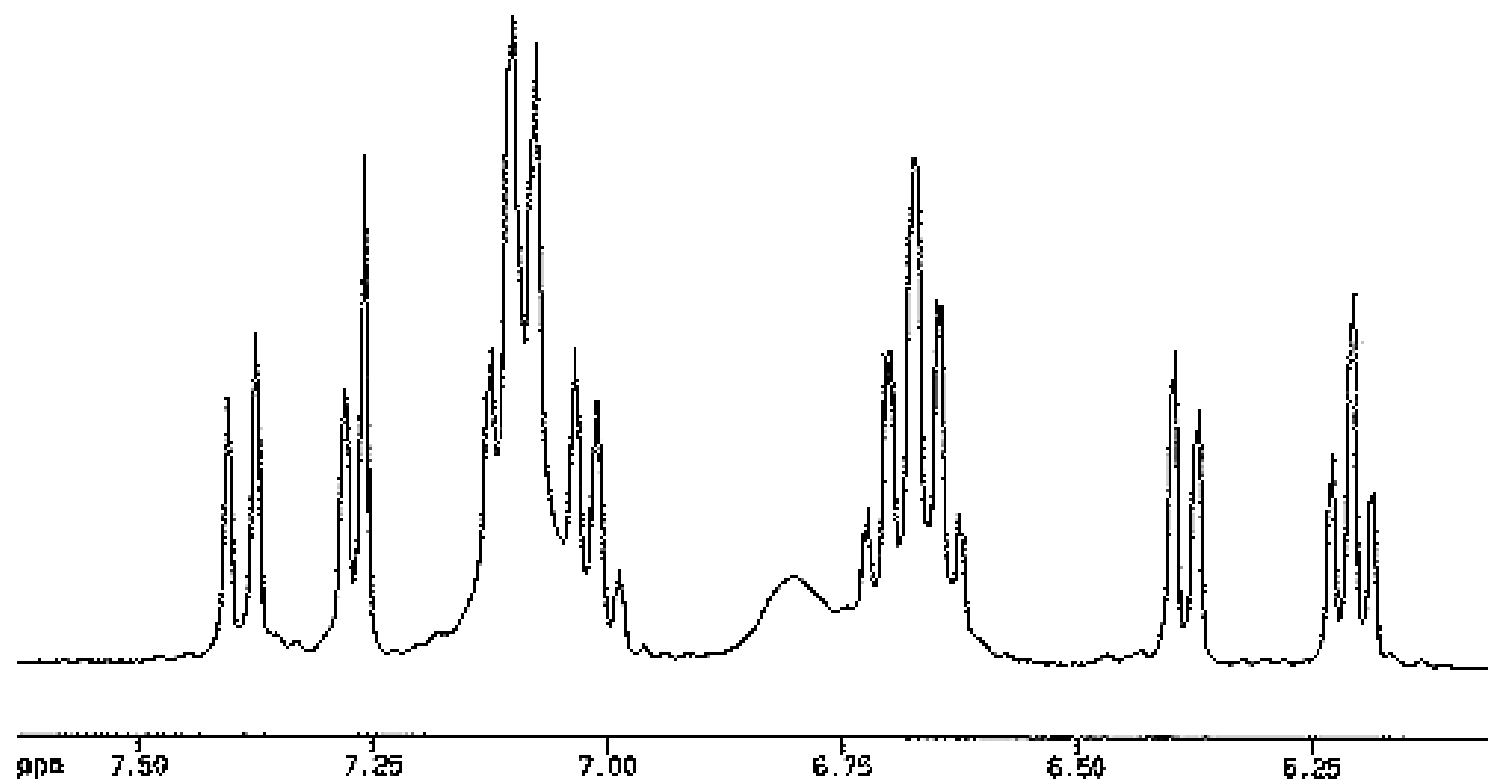

Figure S1

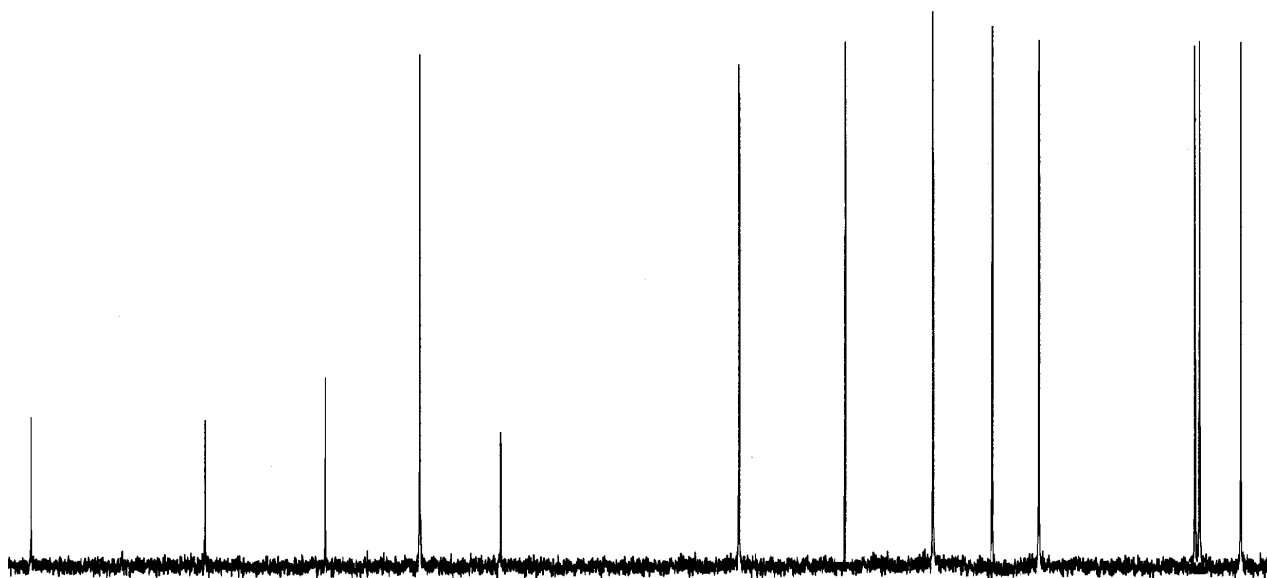

**Figure S2**

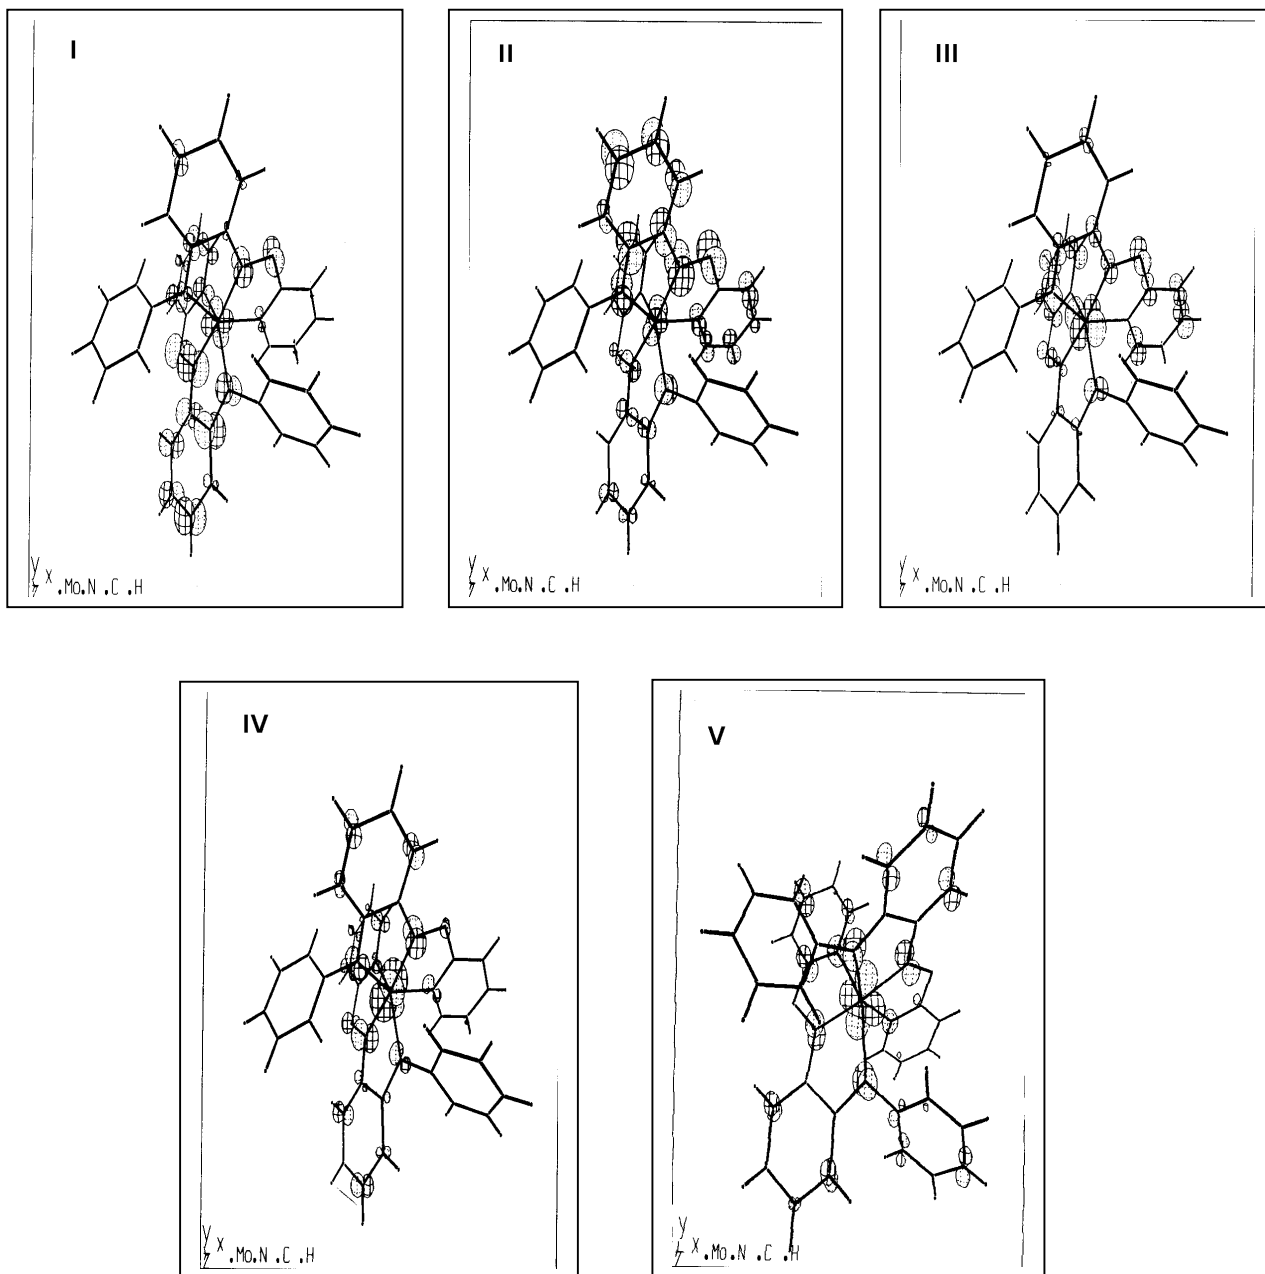**Figure S3**
